# Supplementary material
Source: PubMed Central journal article supplement (PMC3982684)
Supplement: 0b009c88a8609c1f63d4d85290e021c4_genetics.113.158766-13.pdf [file 0b009c88a8609c1f63d4d85290e021c4_genetics.113.158766-13.pdf]

**Table S4** Amino acid identity of BmorCPR2 with its orthologs.

|                          | <i>B. mori</i> | <i>P. polytes</i> | <i>P. xuthus</i> | <i>D. plexippus</i> | <i>M. sexta</i> | <i>H. melpomene</i> | <i>S. cynthia ricini</i> | <i>P. xylostellata</i> | <i>S. frugiperda</i> |
|--------------------------|----------------|-------------------|------------------|---------------------|-----------------|---------------------|--------------------------|------------------------|----------------------|
| <i>B. mori</i>           | 100%           | 59%               | 58%              | 57%                 | 65%             | 55%                 | 59%                      | 54%                    | 52%                  |
| <i>P. polytes</i>        |                | 100%              | 75%              | 58%                 | 54%             | 58%                 | 64%                      | 40%                    | 50%                  |
| <i>P. xuthus</i>         |                |                   | 100%             | 60%                 | 57%             | 64%                 | 62%                      | 47%                    | 45%                  |
| <i>D. plexippus</i>      |                |                   |                  | 100%                | 51%             | 66%                 | 58%                      | 40%                    | 46%                  |
| <i>M. sexta</i>          |                |                   |                  |                     | 100%            | 58%                 | 64%                      | 50%                    | 53%                  |
| <i>H. melpomene</i>      |                |                   |                  |                     |                 | 100%                | 54%                      | 43%                    | 44%                  |
| <i>S. cynthia ricini</i> |                |                   |                  |                     |                 |                     | 100%                     | 45%                    | 61%                  |
| <i>P. xylostellata</i>   |                |                   |                  |                     |                 |                     |                          | 100%                   | 47%                  |
| <i>S. frugiperda</i>     |                |                   |                  |                     |                 |                     |                          |                        | 100%                 |
