# Supplementary material
Source: PubMed Central journal article supplement (PMC3982684)
Supplement: 22b5a03b293b89a6c6da0fcee909e834_genetics.113.158766-20.pdf [file 22b5a03b293b89a6c6da0fcee909e834_genetics.113.158766-20.pdf]

**Table S3** Statistic of RNAi

| Treatment         | Injected No. | No. of successful ecdysis | living and exhibiting RNAi phenotype | No. of Death during the molting stage |
|-------------------|--------------|---------------------------|--------------------------------------|---------------------------------------|
| <i>dsBmorCPR2</i> | 55           | 30                        | 22                                   | 3                                     |
| <i>dsRed</i>      | 43           | 41                        | 0                                    | 2                                     |
