# Supplementary material
Source: PubMed Central journal article supplement (PMC3982684)
Supplement: 88a131793e1ca55bdaa93ba02b8a3fb8_genetics.113.158766-14.pdf [file 88a131793e1ca55bdaa93ba02b8a3fb8_genetics.113.158766-14.pdf]

**Table S1 Primers used in this study**

Available for download as an Excel file at <http://www.genetics.org/lookup/suppl/doi:10.1534/genetics.113.158766/-/DC1>

**Table S2 LC-MS/MS identification in analysis of BmorCPR2 in target gels**

| Gel at<br>~15.3 kD      | Protein requiring<br>to be focused on | MW<br>Charge   | PI<br>Rank | No. of unique<br>peptides | UniquePepCount<br>MH+                                        | Sequence<br>Coverage<br>(%) | Peptide<br>sequences                                                                                                           | motif |
|-------------------------|---------------------------------------|----------------|------------|---------------------------|--------------------------------------------------------------|-----------------------------|--------------------------------------------------------------------------------------------------------------------------------|-------|
| Dazao-SDS PAGE          | BmorCPR2                              | 15270.2        | 5.06       | 5                         | 1363.498<br>1079.1851<br>3295.4731<br>1837.0688<br>1965.2418 | 51.7                        | K.NVNSEYPAIEVK.G<br>K.SDEYAAPVVK.S<br>K.SSYDITPEGHFQFNYETNGIYA<br>QAEGAVK.N<br>R.ALAYIEAHPPSPSVVER.K<br>R.ALAYIEAHPPSPSVVERK.V | RR-1  |
| Dazao-chitin<br>binding | BmorCPR2                              | 15270.2        | 5.06       | 3                         | 1363.498<br>1079.1851<br>1837.0688                           | 31.5                        | K.NVNSEYPAIEVK.G<br>K.SDEYAAPVVK.S<br>R.ALAYIEAHPPSPSVVER.K                                                                    | RR-1  |
| Dazao-stony-SDS<br>PAGE | BmorCPR2                              | - <sup>a</sup> | -          | -                         | -                                                            | -                           | -                                                                                                                              | -     |

<sup>a</sup> undetected by LC-MS/MS
