# Supplementary material
Source: PubMed Central journal article supplement (PMC3982684)
Supplement: a852428e7a35bd182abc06869df28e7a_genetics.113.158766-4.pdf [file a852428e7a35bd182abc06869df28e7a_genetics.113.158766-4.pdf]

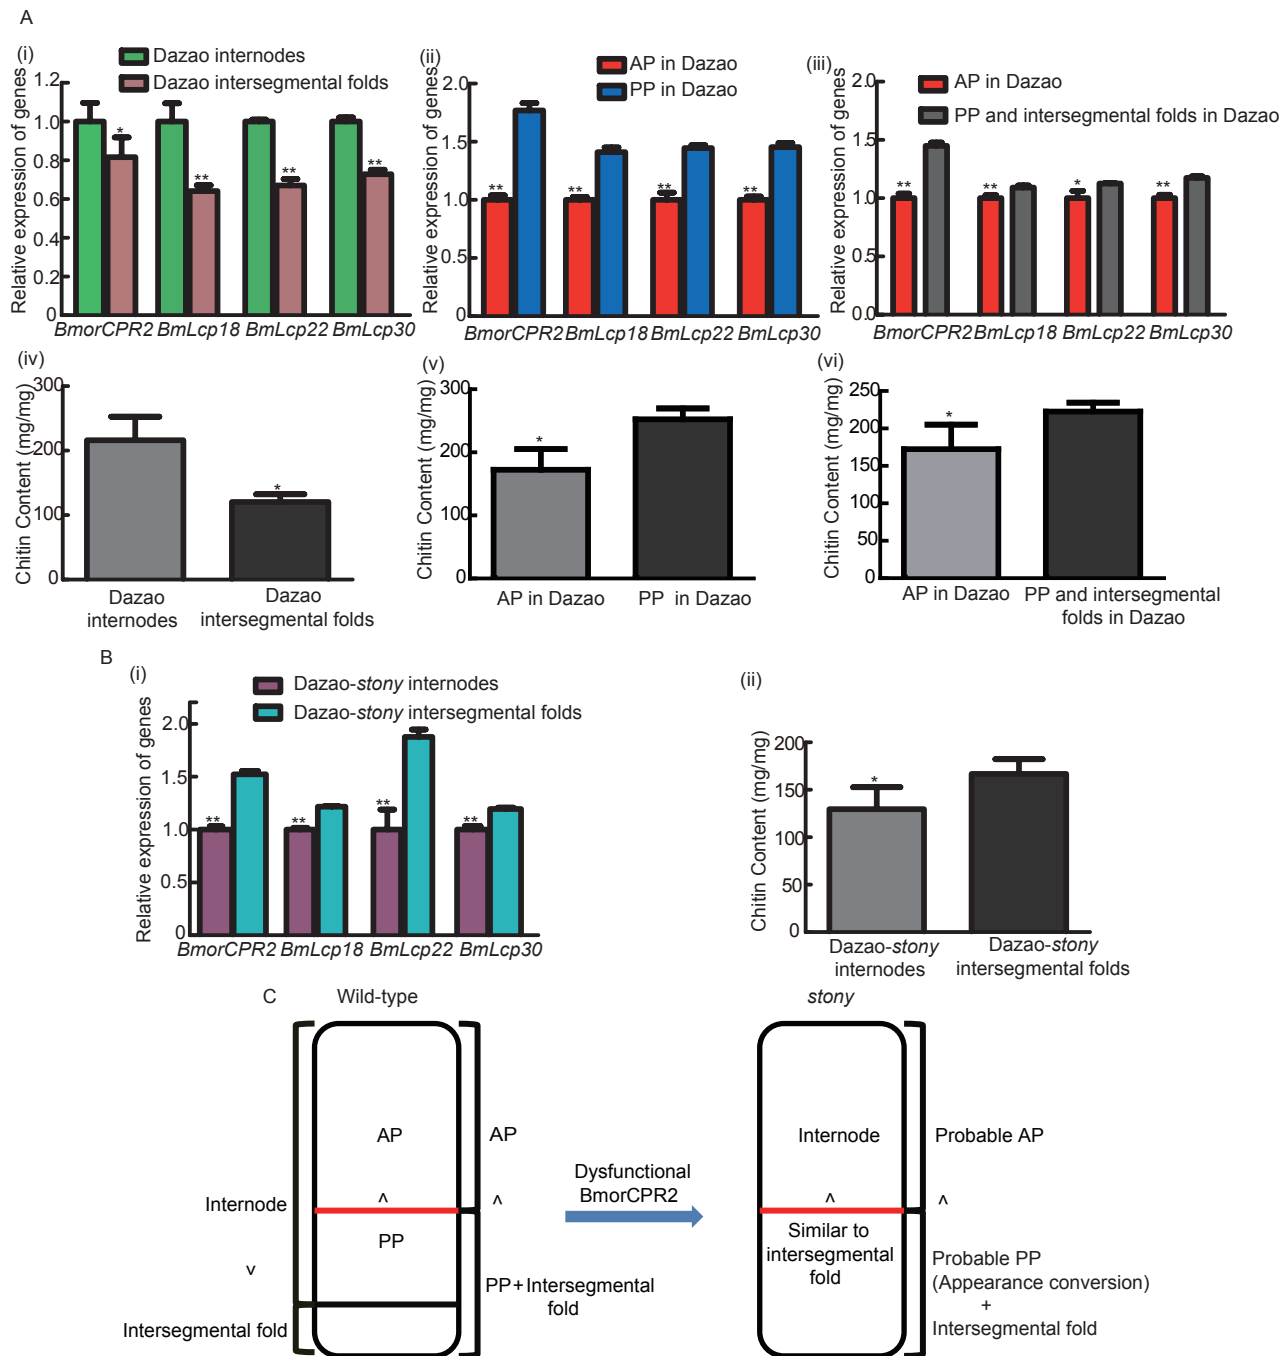

**Figure S7** Detailed data of Gene expression profiles and chitin distribution in various parts of segmental cuticle in Dazao and Dazao-*stony*. **A.** Detailed data of cuticular gene expression profiles and chitin distribution in different parts of Dazao dorsal segment cuticle. (i) and (iv) represent gene expression profiles ( $n=3$ ) and chitin content ( $n=4$ ) of the internodes and intersegmental folds in Dazao, respectively. (ii) and (v) represent the gene expression profiles ( $n=3$ ) and chitin content ( $n=3$ ) of AP and PP in Dazao, respectively. (iii) and (vi) represent gene expression profiles ( $n=3$ ) and chitin content ( $n=3$ ) of the anterior and remaining parts (posterior parts and intersegmental folds) in Dazao, respectively. Data are presented as mean values  $\pm$  S.D. Student's *t*-test, \*represent  $p<0.05$ , \*\*represents  $p<0.01$ . **B.** Detailed data of cuticular gene expression profiles and chitin quantification in different parts of Dazao-*stony* segment. (i) represents gene expression profiles ( $n=3$ ) of internodes and intersegmental folds in Dazao-*stony*. Data are presented as mean values  $\pm$  S.D. Student's *t*-test, \*\* represents  $p<0.01$ . (ii) represents the chitin content ( $n=4$ ) of the internodes and variant intersegmental folds in Dazao-*stony*. Data are presented as mean values  $\pm$  S.D. Student's *t*-test, \*represents  $p<0.05$ . **C.** Derived schematic diagram for formation of the abnormal intersegmental fold in *stony* mutant. The black line represents the boundary of internode and intersegmental fold in Dazao. The red line represent the boundary of AP and PP. The tip of symbol '^' and symbol 'v' point to the parts with lower genes expression and chitin content.
