# Supplementary material
Source: PubMed Central journal article supplement (PMC3982684)
Supplement: b827d1a658bcdecb813142efa837a640_genetics.113.158766-6.pdf [file b827d1a658bcdecb813142efa837a640_genetics.113.158766-6.pdf]

Full-length cDNA of *BmorCPR3*

Dazao : ACAGTCACACATCGTCCGTTAACACAGACACACTCGAAATGAGAACTTACATCTTCCTCGCTTTGGTCGG : 70  
Dazao-stony : ACAGTCACACATCGTCCGTTAACACAGACACACTCGAAATGAGAACTTACATCTTCCTCGCTTTGGTCGG : 70  
ACAGTCACACATCGTCCGTTAACACAGACACACTCGAAATGAGAACTTACATCTTCCTCGCTTTGGTCGG

Dazao : GGTAGCCGTCCCTGACGTTTCTCACGTCGTGCGCACTGGTGAAGCTGATGCCCAAATTTGTGTGCGCAAGAT : 140  
Dazao-stony : GGTAGCCGTCCCTGACGTTTCTCACGTCGTGCGCACTGGTGAAGCTGATGCCCAAATTTGTGTGCGCAAGAT : 140  
GGTAGCCGTCCCTGACGTTTCTCACGTCGTGCGCACTGGTGAAGCTGATGCCCAAATTTGTGTGCGCAAGAT

Dazao : GCTGACGTTTTTCCCGACAAATACCAGTACCAATATCAGACCAGCAACGGAATCAGTGGCCAGGAACAAG : 210  
Dazao-stony : GCTGACGTTTTTCCCGACAAATACCAGTACCAATATCAGACCAGCAACGGAATCAGTGGCCAGGAACAAG : 210  
GCTGACGTTTTTCCCGACAAATACCAGTACCAATATCAGACCAGCAACGGAATCAGTGGCCAGGAACAAG

Dazao : GAGTGCTTGTAAACGAGGCCCGTGAGGATGCATCCATCGCCGTCOAAGGTTCAAGCGGECTACACTGCCCC : 280  
Dazao-stony : GAGTGCTTGTAAACGAGGCCCGTGAGGATGCATCCATCGCCGTCOAAGGTTCAAGCGGECTACACTGCCCC : 280  
GAGTGCTTGTAAACGAGGCCCGTGAGGATGCATCCATCGCCGTCOAAGGTTCAAGCGGECTACACTGCCCC

Dazao : TGATGGTACTCCCATTCAGATCACTTACACTGCTGACGCCAACGGATACCAGCCTTCGGGTGCCCATCTG : 350  
Dazao-stony : TGATGGTACTCCCATTCAGATCACTTACACTGCTGACGCCAACGGATACCAGCCTTCGGGTGCCCATCTG : 350  
TGATGGTACTCCCATTCAGATCACTTACACTGCTGACGCCAACGGATACCAGCCTTCGGGTGCCCATCTG

Dazao : CCCACTACCCAGCCCCTGTCCCAATCCCAGATTACATCGCCCGGGCCATCGAGTACATCAGAACTCACC : 420  
Dazao-stony : CCCACTACCCAGCCCCTGTCCCAATCCCAGATTACATCGCCCGGGCCATCGAGTACATCAGAACTCACC : 420  
CCCACTACCCAGCCCCTGTCCCAATCCCAGATTACATCGCCCGGGCCATCGAGTACATCAGAACTCACC

Dazao : CACCCAAGCCAGAGGTCGCCCCAACGTATTTAAGTTATATGATAGTTGATAAGGACGACTATTGTTGAAAC : 490  
Dazao-stony : CACCCAAGCCAGAGGTCGCCCCAACGTATTTAAGTTATATGATAGTTGATAAGGACGACTATTGTTGAAAC : 490  
CACCCAAGCCAGAGGTCGCCCCAACGTATTTAAGTTATATGATAGTTGATAAGGACGACTATTGTTGAAAC

Dazao : ATCGTAAGCCATAGCACTGCCTATCATTATATGTCTAGTCTCGCAATATGTAAAATAAATTCAATTAA : 560  
Dazao-stony : ATCGTAAGCCATAGCACTGCCTATCATTATATGTCTAGTCTCGCAATATGTAAAATAAATTCAATTAA : 560  
ATCGTAAGCCATAGCACTGCCTATCATTATATGTCTAGTCTCGCAATATGTAAAATAAATTCAATTAA

Dazao : AGTTAAA : 567  
Dazao-stony : AGTTAAA : 567  
AGTTAAA

**Figure S2** Full-length *BmorCPR3* cDNA sequences of Dazao and Dazao-stony.
