# Supplementary material
Source: PubMed Central journal article supplement (PMC3982684)
Supplement: d07ef253fde6837c0bfeb2eb54ccba03_genetics.113.158766-8.pdf [file d07ef253fde6837c0bfeb2eb54ccba03_genetics.113.158766-8.pdf]

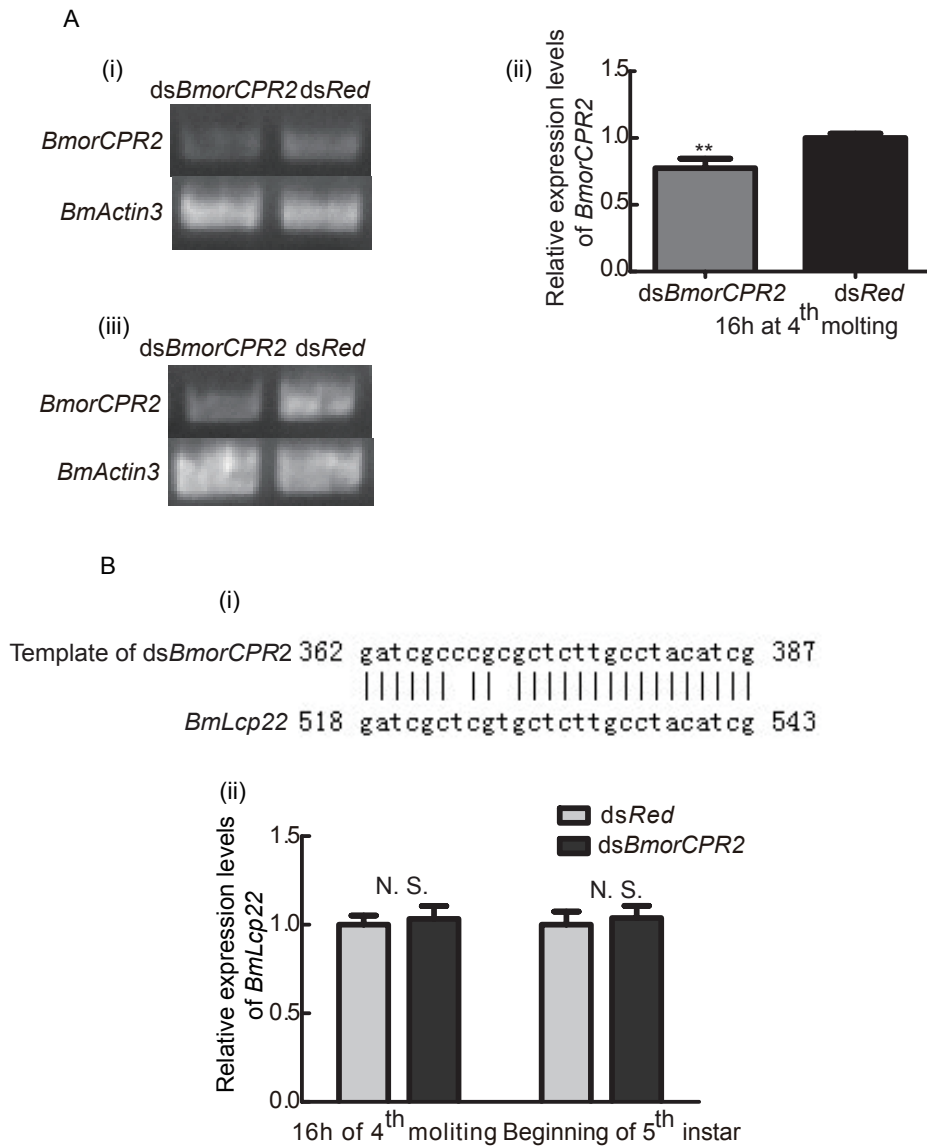

**Figure S5** Analysis of the effects of RNAi. A. RT-PCR and qRT-PCR analysis. (i) and (ii) represent expression of *BmorCPR2* in larvae subjected to RNAi at 16 h of 4<sup>th</sup> molting. (iii) represent expression of *BmorCPR2* in larvae subjected to RNAi at beginning of 5<sup>th</sup> instar. B. Detection of RNAi off-target effects. (i) Nucleic acid alignment between *BmLcp22* and ds*BmorCPR2* template. (ii) Relative expression levels of *BmLcp22*. Data are presented as mean values  $\pm$  S.D. N.S. indicates no significant differences in the *BmLcp22* expression levels between ds*BmorCPR2* and ds*Red* groups.
