# Supplementary material
Source: PubMed Central journal article supplement (PMC3982684)
Supplement: ea58728e11653e9417029813f128c137_genetics.113.158766-1.pdf [file ea58728e11653e9417029813f128c137_genetics.113.158766-1.pdf]

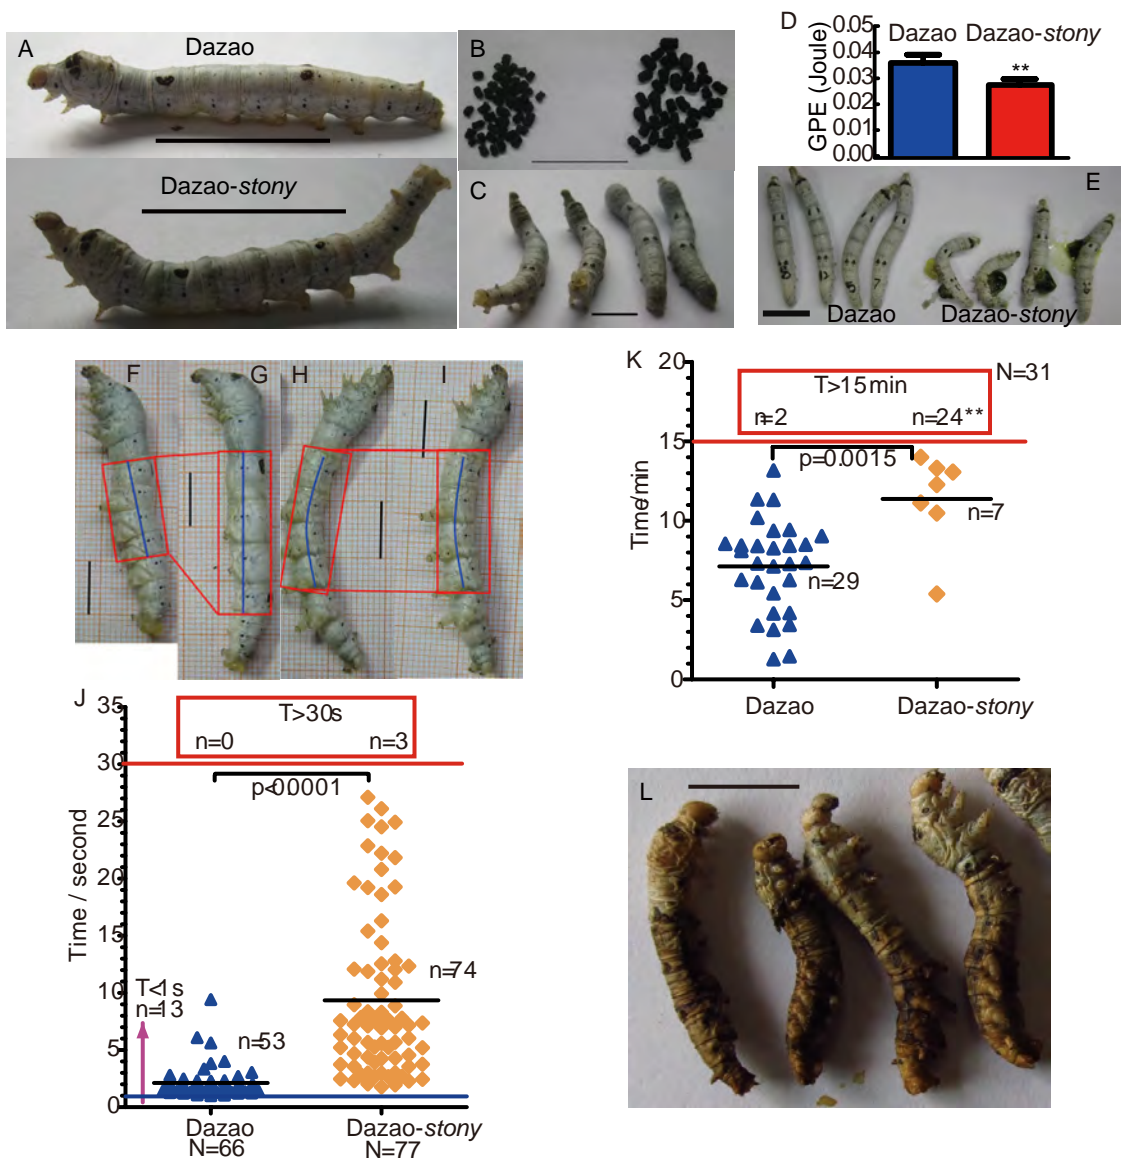

**Figure S1** Additional phenotype and behavior assays of *stony* mutant. A. represents the phenotypes of the sides of Dazao and Dazao-*stony*, respectively. Scale bar: 2cm. B. Phenotypes of the excrement of Dazao and Dazao-*stony*. Scale bar: 2 cm. C. Rectocele phenomenon of Dazao-*stony*. Scale bar: 1 cm. D. Average of the GPE (gravitational potential energy) of Dazao and Dazao-*stony* strains selected for the dropping experiment,  $h=2m$ , ( $n=20$ ). Data represent mean values  $\pm$  S.D. Student's *t* test, \*\*  $p<0.01$ . E. Body rupture of Dazao-*stony* in the dropping experiment. Scale bar: 1 cm. F and H represent the phenotypes of Dazao and Dazao-*stony* injected with air, respectively. Scale bar: 1 cm. G and I represent the phenotypes of stretched individuals in F and H, respectively. Scale bar: 1 cm. The red box includes the abdomen segments (2<sup>nd</sup> to 5<sup>th</sup>) and the blue line represents length. J. Comparative inversion tests on Dazao and Dazao-*stony*. Both red and blue lines represent threshold time. The numbers in the red box indicate individuals which cannot turn over in 30 s. The time of turning over in Dazao was significantly lower than that in Dazao-*stony* within the set time-frame (30 s). Mann-Whitney *U*-test.  $P<0.0001$ . K. crawling ability test under food inducement. The red line represents the threshold time. The numbers in the red box indicate individuals which cannot touch mulberry leaves in 15 min. \*\* represents  $p<0.01$   $\chi^2$ -test. Compared to Dazao, Dazao-*stony* needed more time to touch mulberry leaves within the set time-frame (15 min). Mann-Whitney *U*-test.  $P<0.0001$ . Additionally, due to strong pressure in the body cavity, physical coordination of Dazao-*stony* was significantly poorer than that of Dazao during the crawling process (File S8). L. Phenotypes of *stony* mutants at the beginning of 5<sup>th</sup> instar with molting difficulties. Scale bar: 1 cm.

Full-length cDNA of *BmorCPR3*

Dazao : ACAGTCACACATCGTCCGTTAACACAGACACACTCGAAATGAGAACTTACATCTTCCTCGCTTTGGTCGG : 70  
Dazao-stony : ACAGTCACACATCGTCCGTTAACACAGACACACTCGAAATGAGAACTTACATCTTCCTCGCTTTGGTCGG : 70  
ACAGTCACACATCGTCCGTTAACACAGACACACTCGAAATGAGAACTTACATCTTCCTCGCTTTGGTCGG

Dazao : GGTAGCCGT CGCT GACGTTTCTCACGTCGTGCGCACTGGTGAAGCTGATGCCCAAATTTGTGTGCGCAAGAT : 140  
Dazao-stony : GGTAGCCGT CGCT GACGTTTCTCACGTCGTGCGCACTGGTGAAGCTGATGCCCAAATTTGTGTGCGCAAGAT : 140  
GGTAGCCGT CGCT GACGTTTCTCACGTCGTGCGCACTGGTGAAGCTGATGCCCAAATTTGTGTGCGCAAGAT

Dazao : GCTGACGTTTTCCCGACAAATACCAGTACCAATATCAGACCAGCAACGGAATCAGTGGCCAGGAACAAG : 210  
Dazao-stony : GCTGACGTTTTCCCGACAAATACCAGTACCAATATCAGACCAGCAACGGAATCAGTGGCCAGGAACAAG : 210  
GCTGACGTTTTCCCGACAAATACCAGTACCAATATCAGACCAGCAACGGAATCAGTGGCCAGGAACAAG

Dazao : GAGTGCTTGTAAACGAGGGCCGTGAGGATGCATCCATCGCCGTCCAAGGTTCAAGCGGCTACACTGCCCC : 280  
Dazao-stony : GAGTGCTTGTAAACGAGGGCCGTGAGGATGCATCCATCGCCGTCCAAGGTTCAAGCGGCTACACTGCCCC : 280  
GAGTGCTTGTAAACGAGGGCCGTGAGGATGCATCCATCGCCGTCCAAGGTTCAAGCGGCTACACTGCCCC

Dazao : TGATGGTACTCCCATTCAGATCACTTACACTGCTGACGCCAACGGATACCAGCCTTCGGGTGCCCATCTG : 350  
Dazao-stony : TGATGGTACTCCCATTCAGATCACTTACACTGCTGACGCCAACGGATACCAGCCTTCGGGTGCCCATCTG : 350  
TGATGGTACTCCCATTCAGATCACTTACACTGCTGACGCCAACGGATACCAGCCTTCGGGTGCCCATCTG

Dazao : CCCACTACCCAGCCCCTGTCCCAATCCCAGATTACATCGCCCGGGCCATCGAGTACATCAGAACTCACC : 420  
Dazao-stony : CCCACTACCCAGCCCCTGTCCCAATCCCAGATTACATCGCCCGGGCCATCGAGTACATCAGAACTCACC : 420  
CCCACTACCCAGCCCCTGTCCCAATCCCAGATTACATCGCCCGGGCCATCGAGTACATCAGAACTCACC

Dazao : CACCCAAGCCAGAGGTCGCCCCAACGTATTTAAGTTATATGATAGTTGATAAGGACGACTATTGTTGAAAC : 490  
Dazao-stony : CACCCAAGCCAGAGGTCGCCCCAACGTATTTAAGTTATATGATAGTTGATAAGGACGACTATTGTTGAAAC : 490  
CACCCAAGCCAGAGGTCGCCCCAACGTATTTAAGTTATATGATAGTTGATAAGGACGACTATTGTTGAAAC

Dazao : ATCGTAAGCCATAGCACTGCCTATCATTTATATGTCTAGTCTCGCAATATGTAAAATAAATTCAATTA : 560  
Dazao-stony : ATCGTAAGCCATAGCACTGCCTATCATTTATATGTCTAGTCTCGCAATATGTAAAATAAATTCAATTA : 560  
ATCGTAAGCCATAGCACTGCCTATCATTTATATGTCTAGTCTCGCAATATGTAAAATAAATTCAATTA

Dazao : AGTTAAA : 567  
Dazao-stony : AGTTAAA : 567  
AGTTAAA

**Figure S2** Full-length *BmorCPR3* cDNA sequences of Dazao and Dazao-stony.

A

```

Dazao      : ACTCAGACAGTCTTGAAAATCACCTGAACATTACAAAAATGAAATTCCTGATTGTCCTCCCCCTCCCGCTCCCGTCCCG : 79
Dazao-stony: ACTCAGACAGTCTTGAAAATCACCTGAACATTACAAAAATGAAATTCCTGATTGTCCTCCCCCTCCCGCTCCCGTCCCG : 79
            ACTCAGACAGTCTTGAAAATCACCTGAACATTACAAAAATGAAATTCCTGATTGTCCTCCCCCTCCCGCTCCCGTCCCG

Dazao      : AAGCCCGGACCTCTCCACATCCCAAGTCTGACGAGTACGCCGCCCGCAGTGGTCAAATCCACCTACGACATCACCCCT : 158
Dazao-stony: AAGCCCGGACCTCTCCACATCCCAAGTCTGACGAGTACGCCGCCCGCAGTGGTCAAATCCACCTACGACATCACCCCT : 158
            AAGCCCGGACCTCTCCACATCCCAAGTCTGACGAGTACGCCGCCCGCAGTGGTCAAATCCACCTACGACATCACCCCT

Dazao      : GAAGCCCACTTCCAGTCAACTACGAGACCCGCAACCGAATTTACGCCCCAGGCTGAAGGTCCCGTCAAGCAACCTCAACT : 237
Dazao-stony: GAAGCCCA-----GTCCCGTCCGAGCAAG----- : 181
            GAAGCCCA                                     GT CCGT  AG A G

Dazao      : CAGAAATACCCCGCCATCGAAGTTAAGGGTCCCTACAAGTACACTTCCCTGACCGACAACCCATCGACCTCCCGTACCT : 316
Dazao-stony: --CAATACCCCGCCATCGAAGTTAAGGGTCCCTACAAGTACACTTCCCTGACCGACAACCCATCGACCTCCCGTACCT : 258
            CAATACCCCGCCATCGAAGTTAAGGGTCCCTACAAGTACACTTCCCTGACCGACAACCCATCGACCTCCCGTACCT

Dazao      : CCCTCAGCAGAACCGTTACCAACCCGAGGGAACCCATCTCCCCACCCCTCACCCAATTCCCGAGCCGATCCCGCCCGCT : 395
Dazao-stony: CCCTCAGCAGAACCGTTACCAACCCGAGGGAACCCATCTCCCCACCCCTCACCCAATTCCCGAGCCGATCCCGCCCGCT : 337
            CCCTCAGCAGAACCGTTACCAACCCGAGGGAACCCATCTCCCCACCCCTCACCCAATTCCCGAGCCGATCCCGCCCGCT

Dazao      : CTTCCCTACATCGAGCCCAACCCCGCCAGCCCTCCCTCCTGGAAGAAAAGTCCCTCCCAACTTGTAGGATAAGTCA : 474
Dazao-stony: CTTCCCTACATCGAGCCCAACCCCGCCAGCCCTCCCTCCTGGAAGAAAAGTCCCTCCCAACTTGTAGGATAAGTCA : 416
            CTTCCCTACATCGAGCCCAACCCCGCCAGCCCTCCCTCCTGGAAGAAAAGTCCCTCCCAACTTGTAGGATAAGTCA

Dazao      : AGACAACAACATACCCCACTAGTACAAACGAAACTGACATAATGTAGGAAATAAACTGTTGATTTAATTTT : 547
Dazao-stony: AGACAACAACATACCCCACTAGTACAAACGAAACTGACATAATGTAGGAAATAAACTGTTGATTTAATTTT : 489
            AGACAACAACATACCCCACTAGTACAAACGAAACTGACATAATGTAGGAAATAAACTGTTGATTTAATTTT

```

B

```

P. xylostella : MKTI I MLALVAVAFAPCA- - - - PTEPI P I LRGESEI SFDGS- YSWAYETGNGI SA'DEKGS LKNI GAEEPAL EVCCGF : 73
S. frugiperda : MKFLVVLTVAVACASADVSHVVK- DDFHAPI ESSSFDI EPGGD- FKYSFKTGNGI YAEESGV LKNANSDYPSLDVSCGF : 77
S. cynthia ricini : MKFLVVLAVAVACASADVSHVVRQDEYVAPI VKSSYDI TPEGN- FCYNFETGNGI YAAADGVVKDFNSEYPSLEIKGAY : 78
B. mori : MKFLI VLAVAVACASADVSHI AKSDEYAAPVVKSSYDI TPEGH- FCFNYETGNGI YACAECGVKNVNSEYPAL EVKGAY : 78
M. sexta : MKFLVVLAVAVACASADVSHI VK- DEASAPVLKSSYDI SPEGN- FCYLYETGNGI VACADGSKVKNVNSEYPAVGI VCGY : 77
P. polytes : MKFLVLFVAV- VALASADVSHI VRTDEYCAPI I KSSYDADPVG- FCYVEYETGNGI AACAGGVVKNVNSEAATLEVKGSV : 77
P. xuthus : MKFLVLFVAV- VALASADVSHI VRSDESCAPI LKSA'ESSSPEGN- YCYVYETGNGI SACAEGVKNVNSESATLEVKGSV : 77
D. plexippus : MKFLVVLAVWAYVSAEYKY- - - - DESAASI VKSS'DSSPEGNSFSYGFESNNGI I SCAECVKNVNSGENPAL EVKGSV : 75
H. melpomene : MKFLVVLAVAVACAADVSHI VRSDESCAPI VKSA'EI SPEGHSFCYAYETANGI YSEADGV LKNVNSDYPALEVKGSV : 79
Mkf 666l a va a adv h de ap6 s P G 5 5 5e3gNGI a a G 6K1 nse p 6e6 G

```

```

P. xylostella : AYPSEDGCGN CLTYI ANENGFPCCGAHLPTPPP I PEA I CRALAYLATAPFPQPE SRR : 129
S. frugiperda : KYTSPECCAI ELSYADENGYRPGGSHLPVGP E I PAA I RSLEYI AAHPSPA E V R : 133
S. cynthia ricini : KYTAPDGTPEVETTYI AXENGYCAGSGSHLPVGP E I PEY I ARSLAYI AAHTPQVAPEV : 134
B. mori : KYTSPDGCPI DLAYIADENGYCPCGSHLPVPHI PEA I ARALAYI EAHPSPS V E : 134
M. sexta : KYTAPDGCVI DVVYKADENGYGPGGSHLPVAPPTPEPI LRALAWI AAHPPAVEKVA : 133
P. polytes : RYTSPDGTPVETTYIADENGYCAGGSHI PVPP E I PELI LRSLQYI AEHPPPAEY K : 133
P. xuthus : RYTAPDGTPEVETTYI ADENGYCAGGSHI PVPP E I PELI LRSLQYI ADHPPPAEY K : 133
D. plexippus : KYNAPDGTPELVVYANENGYCAGSGSHI PVPP E I PELI LRSLQYI AEHPAPVER V : 131
H. melpomene : KYNAPDGTPEVSLQWANENGYCAGSGSHI PCPP E I PELI LRSLQYI ESHPPAVER V : 135
Y pdG 6 5 A ENG5q GsH6P p i Pe I R L 56a hpp e

```

**Figure S3** Sequence characteristics of *BmorCPR2* between Dazao and Dazao-stony. A. Full-length cDNA sequences of *BmorCPR2* between Dazao and Dazao-stony. B. Alignment of *BmorCPR2* and orthologs among nine Lepidoptera species. The orthologs were identified using BLAST (blastp and tblastn), known genomes or EST databases of selected Lepidoptera insects, NCBI, CuticleDB (<http://bioinformatics.biol.uoa.gr/cuticleDB> and OrhtoDB (<http://cegg.unige.ch/orthodb6>). Sequence alignment using Muscle program (<http://www.ebi.ac.uk/Tools/msa/muscle/>), is listed as follows: *Bombyx mori* BmorCPR2, *Papilio polytes* CPR2, BAM18876.1, *Papilio xuthus* CPR2, BAG30800.1, *Danaus plexippus* EHJ77392.1, *Manduca sexta* Msex000162-RB, (Manduca base), *Heliconius melpomene* HMEL002550-PA, (Heliconius Genome Project), *Samia cynthia ricini* I10A02NGRL0007\_H08 (SilkBase), *Plutella xylostella* Px003256.1 (Diamondback moth Genome Database), *Spodoptera frugiperda* Sf1P23819-5-1, (SPODOBASE). The black line represents the RR1 motif.

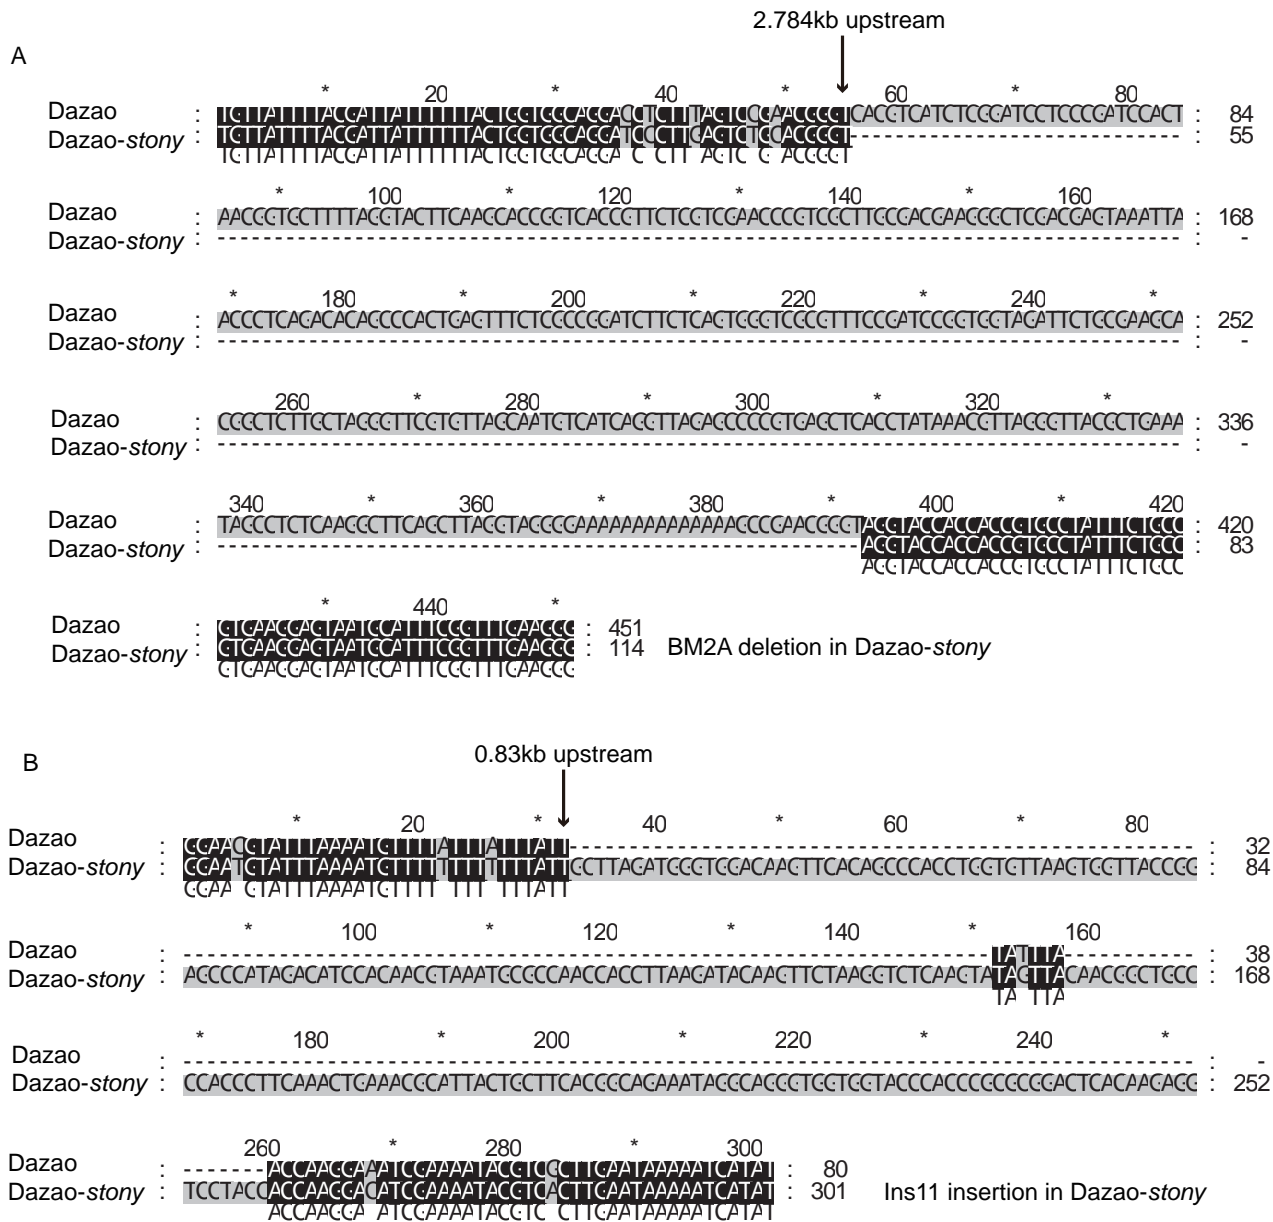

**Figure S4** Comparison of the ~2.78 kb (A) and ~0.83 kb (B) upstream genomic sequences of *BmorCPR2* of Dazao and Dazao-stony.

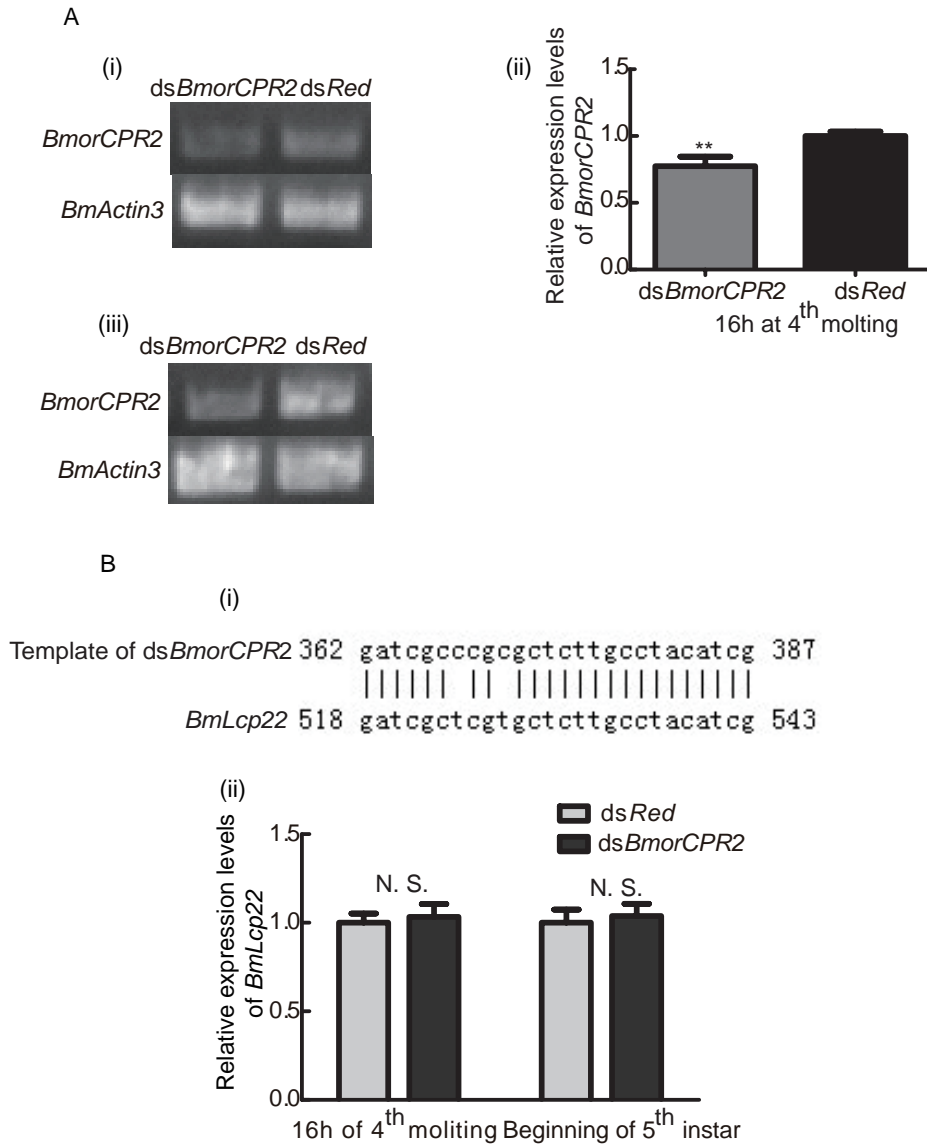

**Figure S5** Analysis of the effects of RNAi. A. RT-PCR and qRT-PCR analysis. (i) and (ii) represent expression of *BmorCPR2* in larvae subjected to RNAi at 16 h of 4<sup>th</sup> molting. (iii) represent expression of *BmorCPR2* in larvae subjected to RNAi at beginning of 5<sup>th</sup> instar. B. Detection of RNAi off-target effects. (i) Nucleic acid alignment between *BmLcp22* and *dsBmorCPR2* template. (ii) Relative expression levels of *BmLcp22*. Data are presented as mean values  $\pm$  S.D. N.S. indicates no significant differences in the *BmLcp22* expression levels between *dsBmorCPR2* and *dsRed* groups.

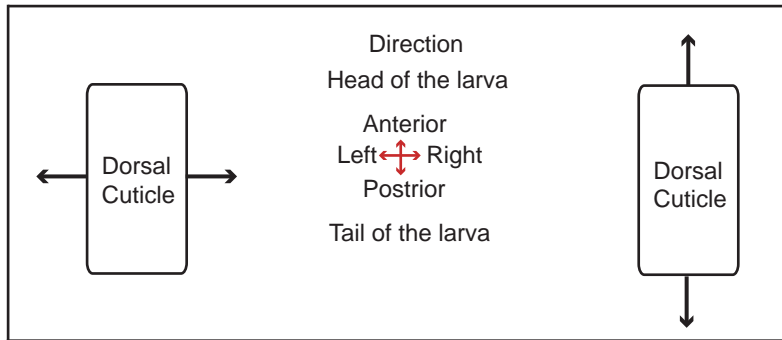

**Figure S6** Schematic diagram of manipulation in the stretching test. Black arrowhead represents the stretching direction and red cross arrowhead indicates location.

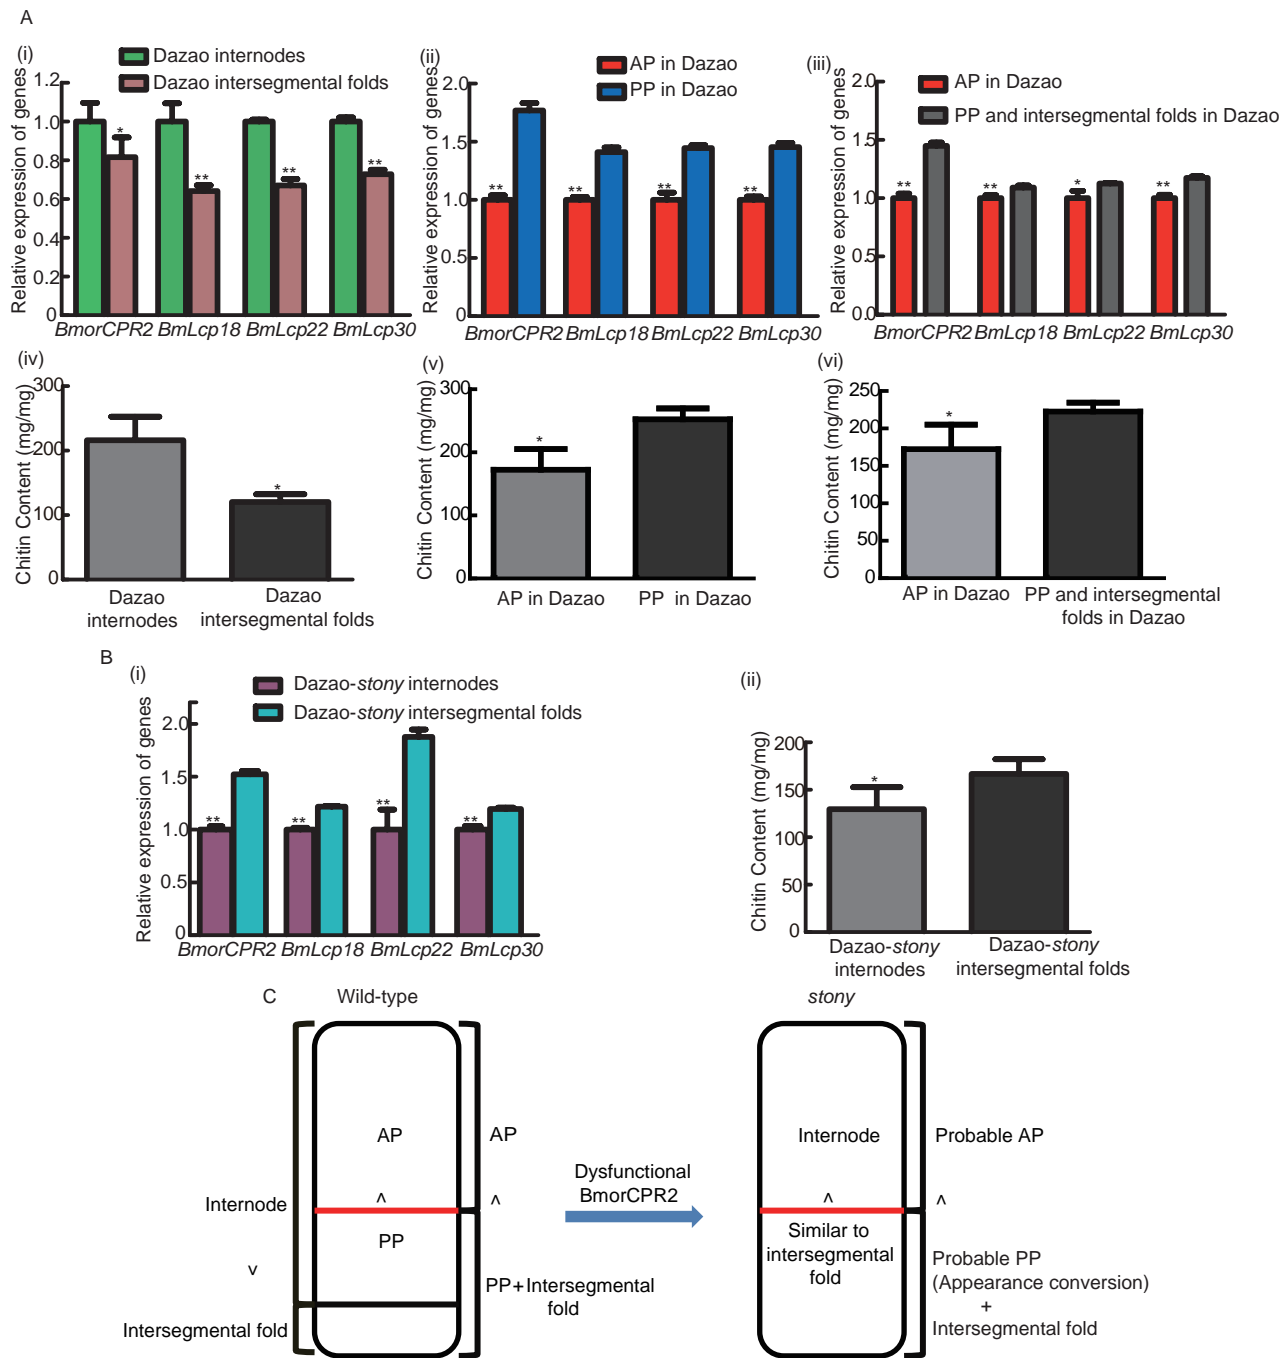

**Figure S7** Detailed data of Gene expression profiles and chitin distribution in various parts of segmental cuticle in Dazao and Dazao-*stony*. **A.** Detailed data of cuticular gene expression profiles and chitin distribution in different parts of Dazao dorsal segment cuticle. (i) and (iv) represent gene expression profiles ( $n=3$ ) and chitin content ( $n=4$ ) of the internodes and intersegmental folds in Dazao, respectively. (ii) and (v) represent the gene expression profiles ( $n=3$ ) and chitin content ( $n=3$ ) of AP and PP in Dazao, respectively. (iii) and (vi) represent gene expression profiles ( $n=3$ ) and chitin content ( $n=3$ ) of the anterior and remaining parts (posterior parts and intersegmental folds) in Dazao, respectively. Data are presented as mean values  $\pm$  S.D. Student's *t*-test, \*represent  $p<0.05$ , \*\*represents  $p<0.01$ . **B.** Detailed data of cuticular gene expression profiles and chitin quantification in different parts of Dazao-*stony* segment. (i) represents gene expression profiles ( $n=3$ ) of internodes and intersegmental folds in Dazao-*stony*. Data are presented as mean values  $\pm$  S.D. Student's *t*-test, \*\* represents  $p<0.01$ . (ii) represents the chitin content ( $n=4$ ) of the internodes and variant intersegmental folds in Dazao-*stony*. Data are presented as mean values  $\pm$  S.D. Student's *t*-test, \*represents  $p<0.05$ . **C.** Derived schematic diagram for formation of the abnormal intersegmental fold in *stony* mutant. The black line represents the boundary of internode and intersegmental fold in Dazao. The red line represent the boundary of AP and PP. The tip of symbol '^' and symbol '\v' point to the parts with lower genes expression and chitin content.

## File S1

### Supporting Methods

#### (a) Detailed operation of physiology test and behavior assays

In the dropping experiment, 20 *Dazao-stony* and *Dazao* individuals were subjected to a height of 2 m, followed by motion of a free falling body. The numbers of ruptured *Dazao* and *Dazao-stony* individuals were added up to compare their abilities to buffer the shock. To compare the flexibility and nesting ability of internode and intersegmental fold between *Dazao* and *Dazao-stony*, we injected 4 mL air into larvae, and stretch along the anterior-posterior axis of the body. To determine abdomen crooking ability, larvae were inverted to turn the dorsum down and the thorax pressed lightly to prevent writhing to the two sides. Subsequently, inversion towards the abdomen was observed. The number of individuals able to writhe to abdomen, time needed, and the angle between the dorsum and horizontal plane (performed using the digital camera, image J, and angle test software) were recorded. To determine grasping state and duration, larvae were placed on the middle of the mallet (diameter: ~0.9 and ~1.4 cm) in the larval grasping experiment. In the inversion assay analyzing dorsum crooking ability, we fixed the back of larvae on the plane carefully and unclamped them quickly to record the rolling state and time required. We additionally performed a food-inducing crawling experiment. Specifically, 5<sup>th</sup> instar day 5 larvae subjected to 10 h starvation were selected. Larvae were placed ~4 cm away from fresh mulberry leaves (DETHIER 1941; SLIFER 1955), and their crawling behavior and time to reach leaves recorded. In the phenotype analysis, physiology test and behavior assays, healthy *Dazao* and *Dazao-stony* larvae on day 5 of 5<sup>th</sup> instar glutted with mulberry leaf and subsequently starved for 4 h were selected, except for those used in the crawling experiment.



### **(b) Detailed operation of chitin binding**

The soluble proteins extracted from sediment were dialyzed to eliminate SDS using Tang's method (TANG *et al.* 2010). Ethanol in mixed chitin beads was discarded and chitin resuspended with binding buffer (20 mM HEPES, 15 mM NaCl, pH 7.4). Next, ~100 µg cuticular protein of *Dazao* was mixed with chitin (volume ratio of 1:2, total volume 1 ml) in a 1.5 mL EP tube. The solution was incubated at 16°C for 4 h and shaken at 40 rpm. Following centrifugation (9000g, 4°C), the supernatant (S-incubation) was collected and added to 1.2 mL washing buffer (20 mM HEPES, 1 M NaCl, pH 7.4). Next, the mixture was shaken for 40 s and centrifuged under set conditions (9000g, 4°C). The supernatant was removed and the wash step repeated once. The final supernatant fraction (W2) and remaining chitin sediment were collected. S-incubation, W2 and chitin sediment were mixed with Laemmli sample buffer and heated at 95°C for 10 min, and the supernatant collected and analyzed using 15% SDS-PAGE.

### **(c) Detailed operation of LC-MS/MS**

The gel was suspended in 200-400 µL decolorizing agent (30% ACN/100 mM NH<sub>4</sub>HCO<sub>3</sub>) until transparent, the supernatant was removed and frozen to dryness. Next, 100 mM DTT was added and incubated for 30 min under 56°C. After removal of the supernatant, 200 mM IAA was added, and the sample incubated in the dark for 20 min. The supernatant was removed and the sample treated with 100 mM NH<sub>4</sub>HCO<sub>3</sub> at room temperature for 15 min. Following removal of the supernatant, ACN was added. After 5 min, the supernatant was blotted and frozen to dryness. Next, the dried sample was incubated overnight with 2.5-10 ng/µL Trypsin solution (37°C, about 20 h) and the enzymatic hydrolysate added to a new EP tube. We further added 100 µL extraction buffer (60%ACN/0.1%TFA) to the gel, followed by ultrasound for 15 min, combined with the enzymatic hydrolysate for freezing to dryness. The capillary performance liquid chromatography method was performed as follows: the chromatographic column was equilibrated with 95% solution A (0.1% formic acid), and the sample

loaded onto Trap column through an automatic sampler. Solution B (84% acetonitrile) flowthrough was as follows: 0-30 min with a linear gradient of 4 to 50%, 30-34 min with a linear gradient of 50 to 100%, and 34-40 min whereby the solution was maintained at 100%. The mass-charge ratios of peptide and peptide fragments were collected using the method for collecting MS2 scans after each full scan. Using BIEWORKS and SEQUEST programs, the raw file was searched in the related database (NCBI, <http://silkworm.swu.edu.cn/silkdb/doc/download.html>). Search steps were referenced to the procedure of Tang et al. (TANG *et al.* 2010).

#### **Literature cited**

- DETHIER, V. G., 1941 The Function of the Antennal Receptors in Lepidopterous Larvae. *Biological Bulletin* **80**: 403-414.
- SLIFER, E. H., 1955 The detection of odors and water vapor by grasshoppers (Orthoptera, Acrididae) and some new evidence concerning the sense organs which may be involved. *Journal of Experimental Zoology* **130**: 301-317.
- TANG, L., J. LIANG, Z. ZHAN, Z. XIANG and N. HE, 2010 Identification of the chitin-binding proteins from the larval proteins of silkworm, *Bombyx mori*. *Insect Biochem Mol Biol* **40**: 228-234.

**Files S2-S8**

Available for download as AVI files at

<http://www.genetics.org/lookup/suppl/doi:10.1534/genetics.113.158766/-/DC1>

- File S2** Video of dropping experiment
- File S3** Video of abdominal crooking test
- File S4** Video of grasping test on the large diameter mallets
- File S5** Video of grasping test on the small diameter mallets
- File S6** Video of inversion test with non hand-touch
- File S7** Video of inversion test with hand-touch
- File S8** Video of crawling ability test

**Table S1 Primers used in this study**

Available for download as an Excel file at <http://www.genetics.org/lookup/suppl/doi:10.1534/genetics.113.158766/-/DC1>

**Table S2 LC-MS/MS identification in analysis of BmorCPR2 in target gels**

| Gel at<br>~15.3 kD      | Protein requiring<br>to be focused on | MW<br>Charge   | PI<br>Rank | No. of unique<br>peptides | UniquePepCount<br>MH+                                        | Sequence<br>Coverage<br>(%) | Peptide<br>sequences                                                                                                            | motif |
|-------------------------|---------------------------------------|----------------|------------|---------------------------|--------------------------------------------------------------|-----------------------------|---------------------------------------------------------------------------------------------------------------------------------|-------|
| Dazao-SDS PAGE          | BmorCPR2                              | 15270.2        | 5.06       | 5                         | 1363.498<br>1079.1851<br>3295.4731<br>1837.0688<br>1965.2418 | 51.7                        | K.NVNSEYPAIEVK.G<br>K.SDEYAAPVVK.S<br>K.SSYDITPEGHFQFNYETGNGIYA<br>QAEGAVK.N<br>R.ALAYIEAHPPSPSVVER.K<br>R.ALAYIEAHPPSPSVVERK.V | RR-1  |
| Dazao-chitin<br>binding | BmorCPR2                              | 15270.2        | 5.06       | 3                         | 1363.498<br>1079.1851<br>1837.0688                           | 31.5                        | K.NVNSEYPAIEVK.G<br>K.SDEYAAPVVK.S<br>R.ALAYIEAHPPSPSVVER.K                                                                     | RR-1  |
| Dazao-stony-SDS<br>PAGE | BmorCPR2                              | - <sup>a</sup> | -          | -                         | -                                                            | -                           | -                                                                                                                               | -     |

<sup>a</sup> undetected by LC-MS/MS

**Table S3** Statistic of RNAi

| Treatment         | Injected No. | No. of successful ecdysis | living and exhibiting RNAi phenotype | No. of Death during the molting stage |
|-------------------|--------------|---------------------------|--------------------------------------|---------------------------------------|
| <i>dsBmorCPR2</i> | 55           | 30                        | 22                                   | 3                                     |
| <i>dsRed</i>      | 43           | 41                        | 0                                    | 2                                     |

**Table S4** Amino acid identity of BmorCPR2 with its orthologs.

|                          | <i>B.</i><br><i>mori</i> | <i>P.</i><br><i>polytes</i> | <i>P.</i><br><i>xuthus</i> | <i>D.</i><br><i>plexippus</i> | <i>M.</i><br><i>sexta</i> | <i>H.</i><br><i>melpomene</i> | <i>S.</i><br><i>cynthia</i><br><i>ricini</i> | <i>P.</i><br><i>xyllostella</i> | <i>S.</i><br><i>frugiperda</i> |
|--------------------------|--------------------------|-----------------------------|----------------------------|-------------------------------|---------------------------|-------------------------------|----------------------------------------------|---------------------------------|--------------------------------|
| <i>B. mori</i>           | 100%                     | 59%                         | 58%                        | 57%                           | 65%                       | 55%                           | 59%                                          | 54%                             | 52%                            |
| <i>P. polytes</i>        |                          | 100%                        | 75%                        | 58%                           | 54%                       | 58%                           | 64%                                          | 40%                             | 50%                            |
| <i>P. xuthus</i>         |                          |                             | 100%                       | 60%                           | 57%                       | 64%                           | 62%                                          | 47%                             | 45%                            |
| <i>D. plexippus</i>      |                          |                             |                            | 100%                          | 51%                       | 66%                           | 58%                                          | 40%                             | 46%                            |
| <i>M. sexta</i>          |                          |                             |                            |                               | 100%                      | 58%                           | 64%                                          | 50%                             | 53%                            |
| <i>H. melpomene</i>      |                          |                             |                            |                               |                           | 100%                          | 54%                                          | 43%                             | 44%                            |
| <i>S. cynthia ricini</i> |                          |                             |                            |                               |                           |                               | 100%                                         | 45%                             | 61%                            |
| <i>P. xyllostella</i>    |                          |                             |                            |                               |                           |                               |                                              | 100%                            | 47%                            |
| <i>S. frugiperda</i>     |                          |                             |                            |                               |                           |                               |                                              |                                 | 100%                           |
